# Supplementary material for: In Vitro Insights into the Role of 7,8-Epoxy-11-Sinulariolide Acetate Isolated from Soft Coral Sinularia siaesensis in the Potential Attenuation of Inflammation and Osteoclastogenesis
Source: MDPI journal article supplement (doi:10.3390/md22020095), 2024-02-19

**Figure S1.**  $^1\text{H}$  NMR spectrum (400 MHz) of 7,8-epoxy-11-sinulariolide acetate in  $\text{CDCl}_3$ .

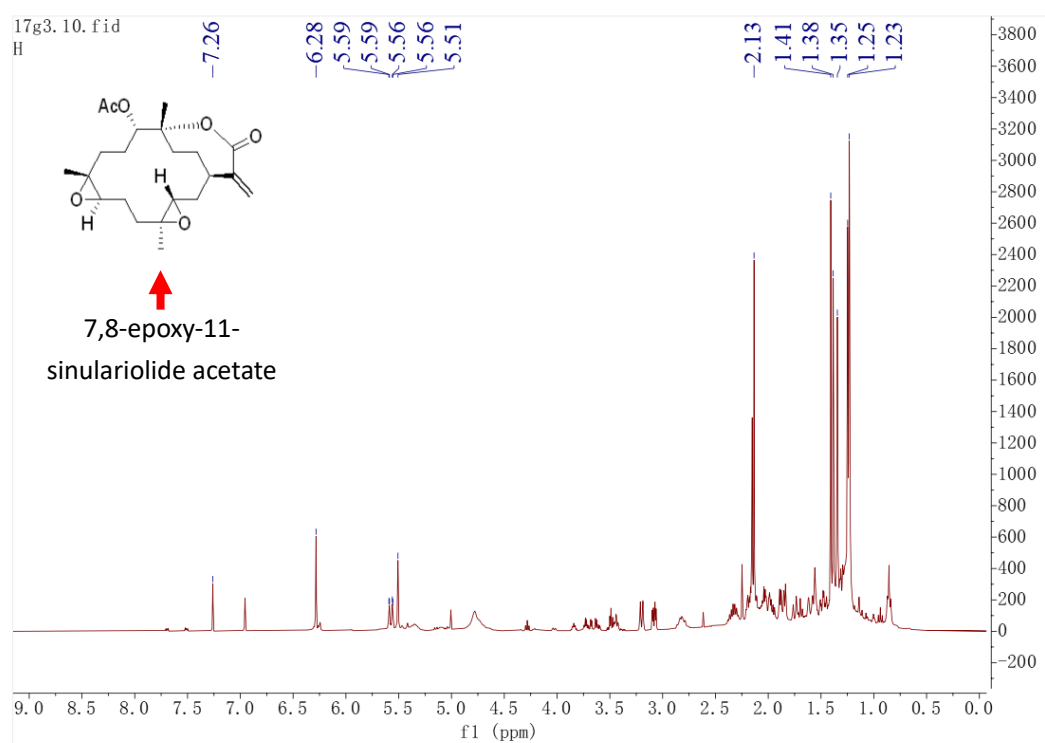

**Figure S2.**  $^{13}\text{C}$  NMR (125 MHz) spectrum of 7,8-epoxy-11-sinulariolide acetate in  $\text{CDCl}_3$ .

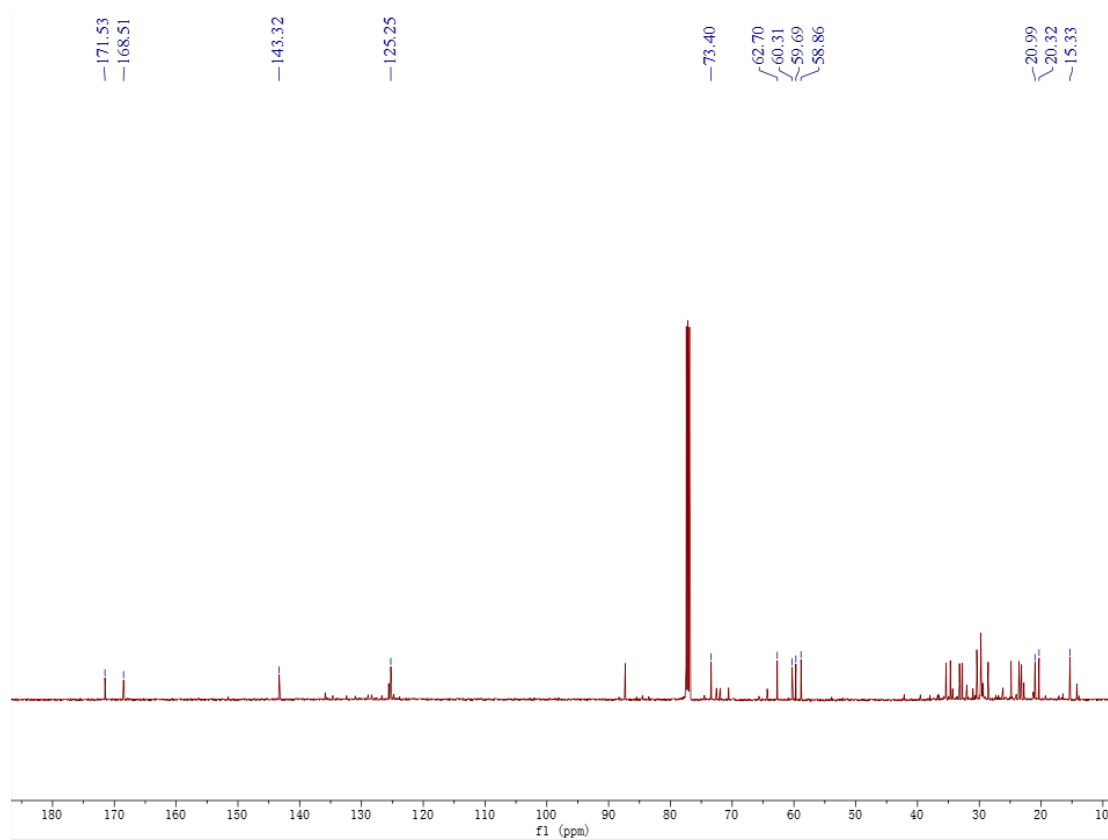

**Figure S3.** The Mass Spectrometry of 7,8-epoxy-11-sinulariolide acetate

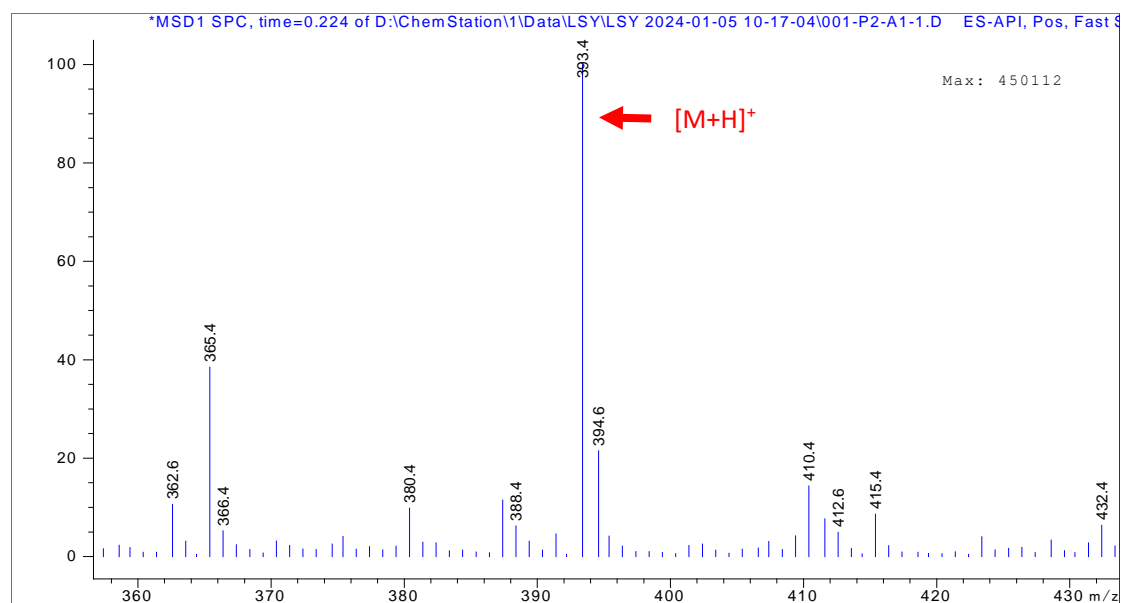

**Figure S4.** Original western blot images for three repeats of iNOS, COX-2, TNF- $\alpha$  and  $\beta$ -actin in Figure 2. (The six groups are CON, LPS, LPS with three concentrations ESA, and LPS with DEX)

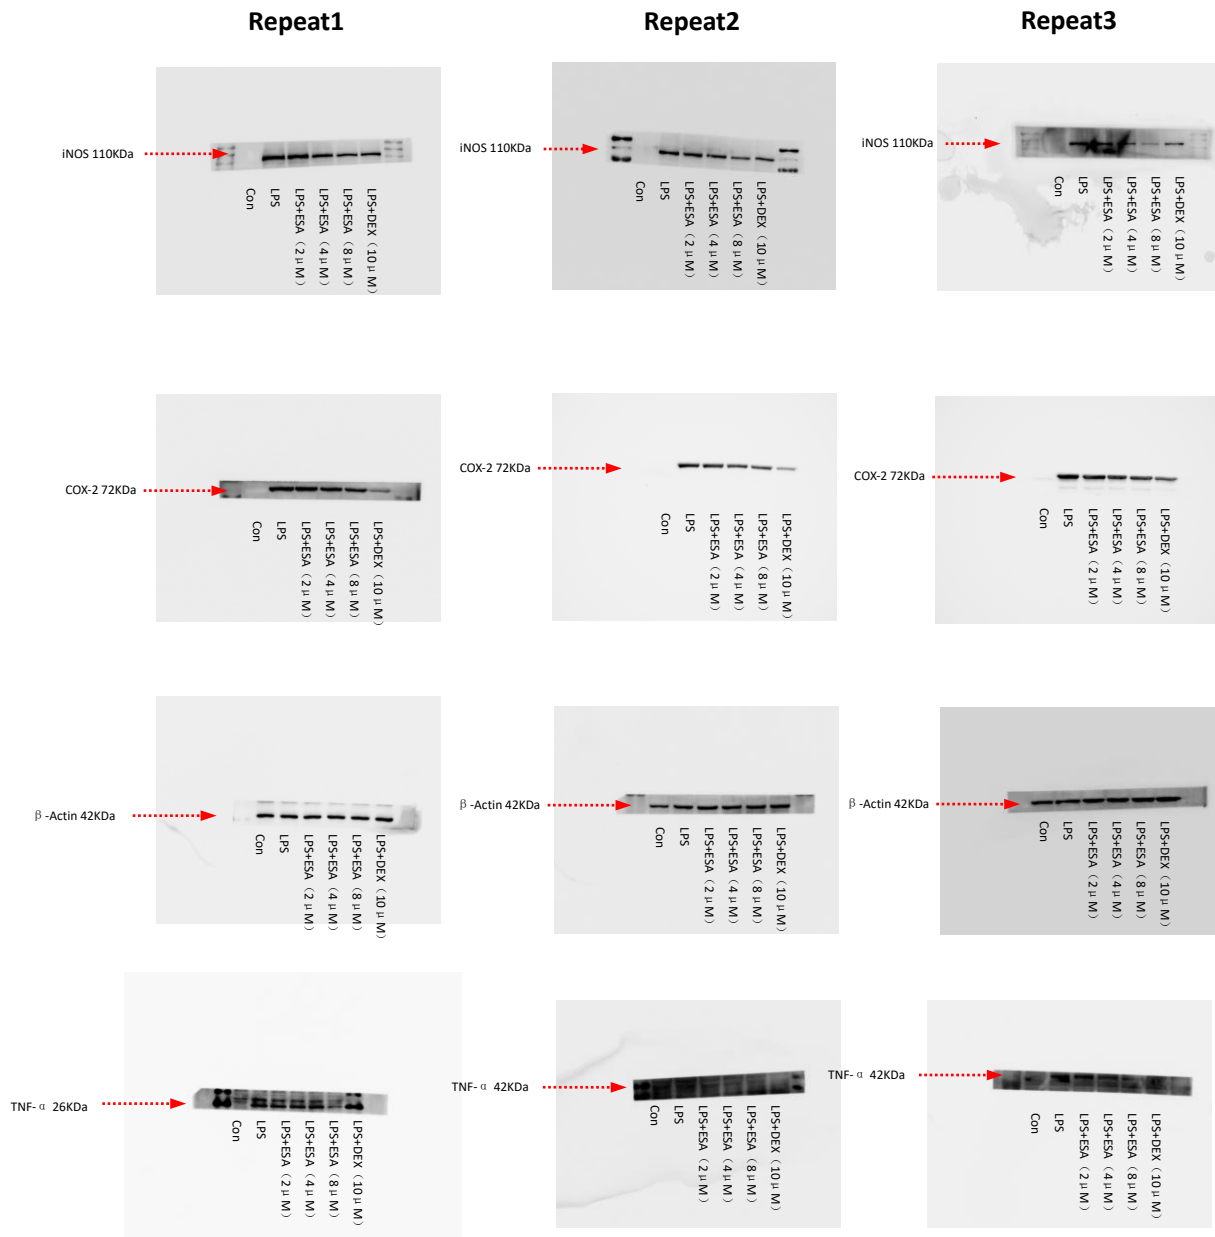



**Figure S6.** Original western blot images for three repeats of p-PI3K, p-JNK, p-AKT, p-p38 and GAPDH in Figure 5A-B. (The six groups are CON, LPS, LPS with three concentrations ESA, and LPS with DEX)

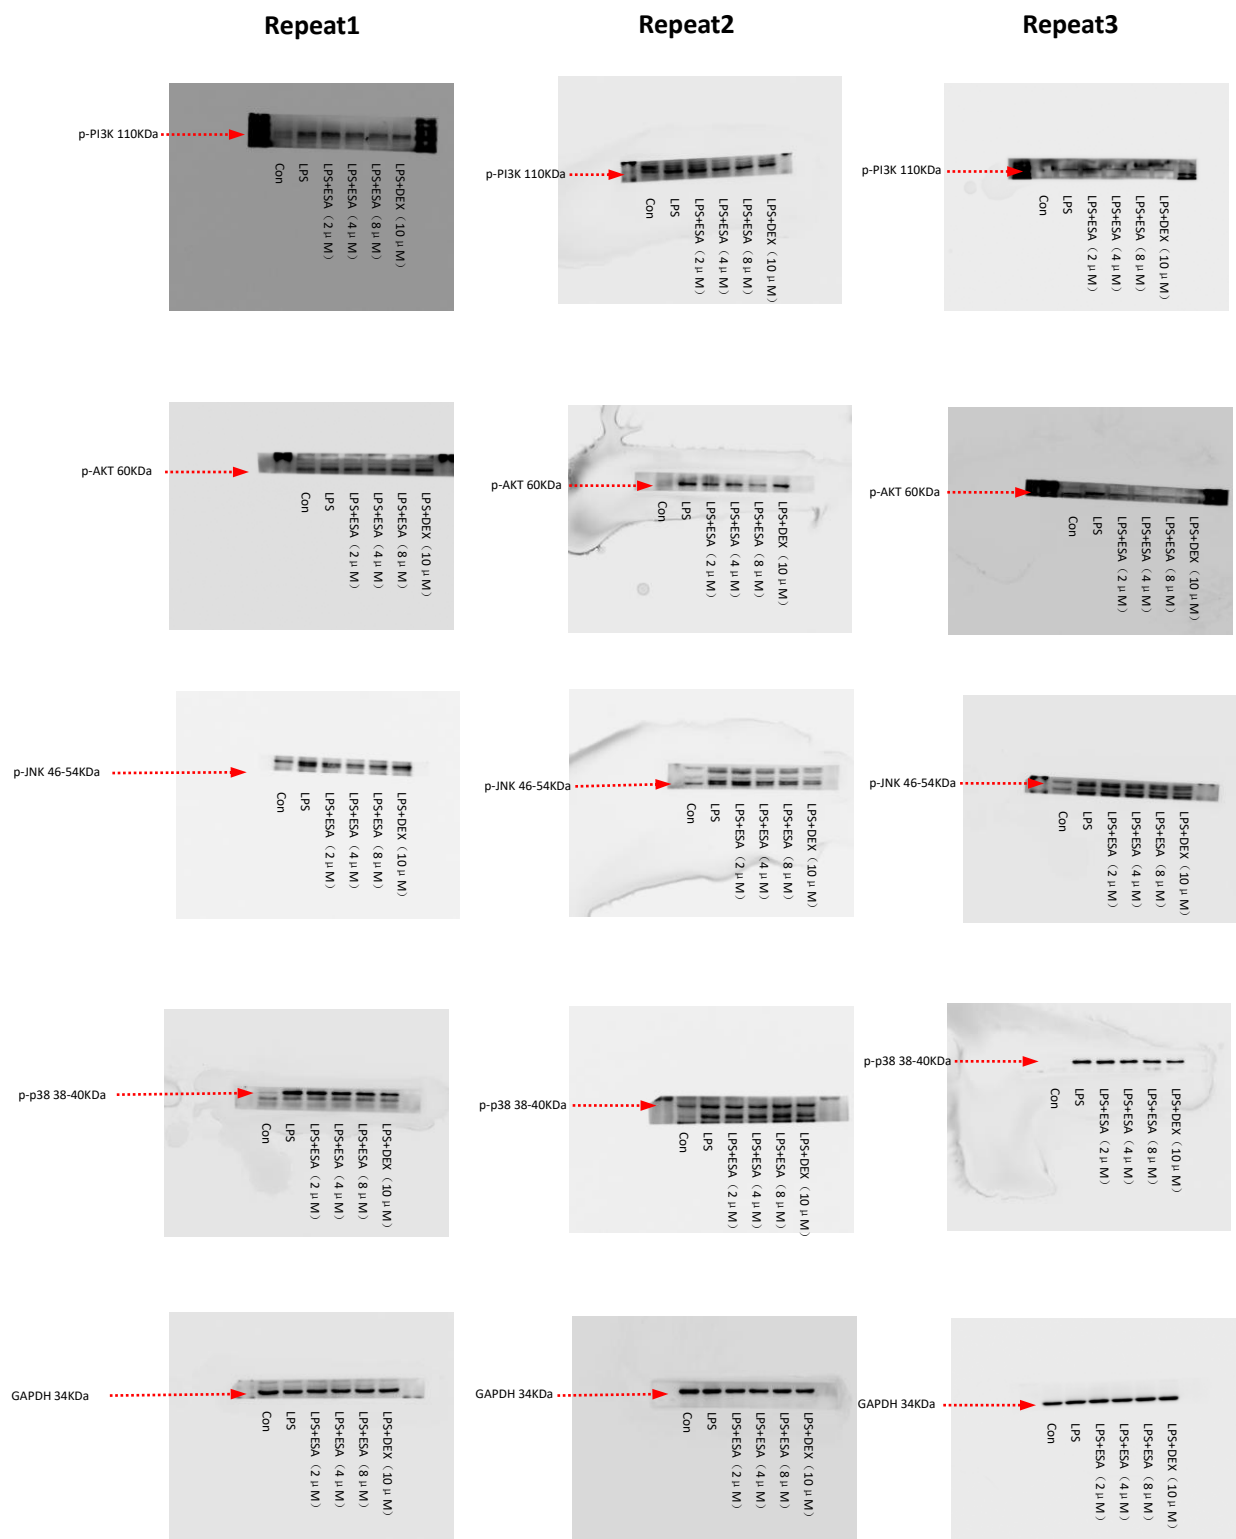

**Figure S7.** Original western blot images for three repeats of PI3K, AKT, JNK, P38 and GAPDH in Figure 5A-B. (The six groups are CON, LPS, LPS with three concentrations ESA, LPS with DEX)

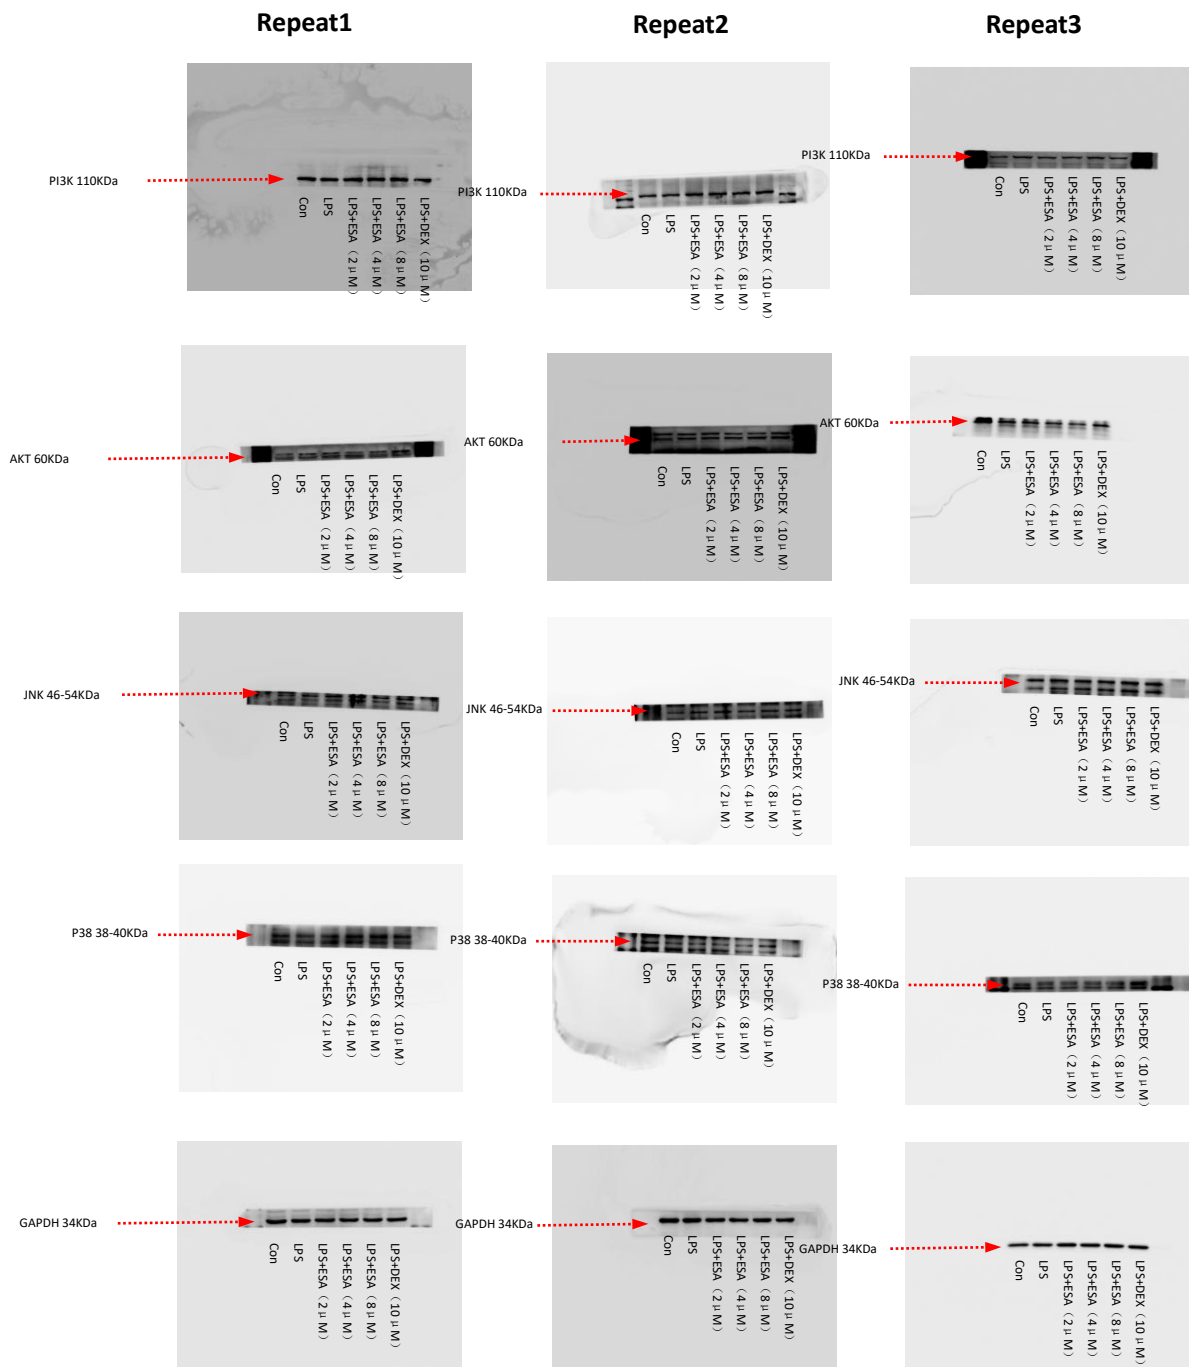

**Figure S8.** Original western blot images for three repeats of NFATc1, MMP9, CTSK and  $\beta$ -actin in Figure 6C. (The five groups are CON, RANKL, RANKL with three concentrations of ESA)

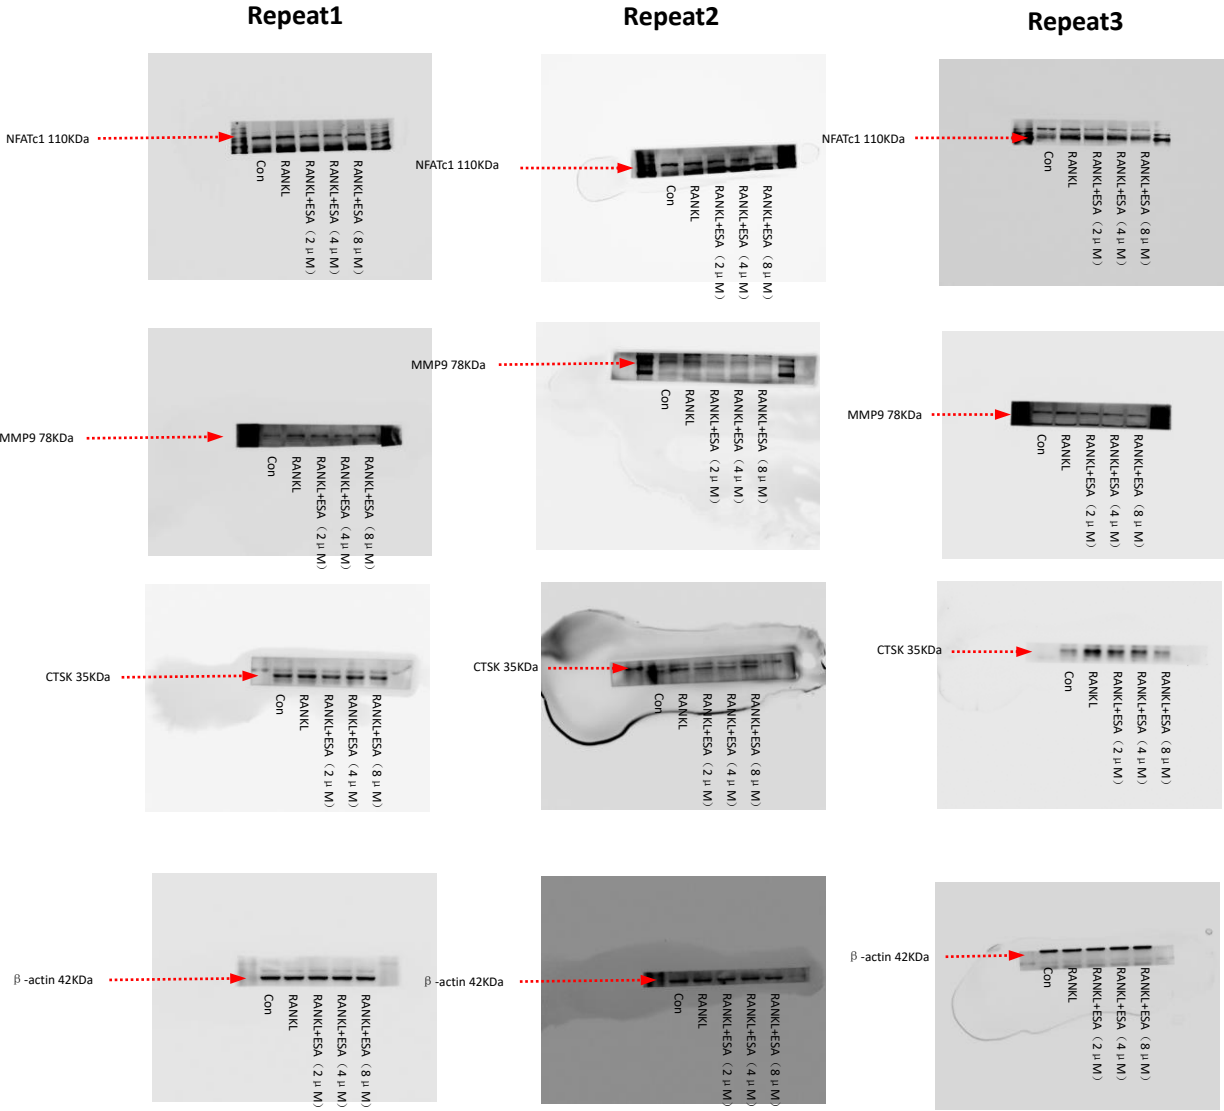



**Figure S9.** Original western blot images for three repeats of p-p65, p-JNK, p-p38, p-ERK in Figure 7A-B (The five groups are CON, RANKL, RANKL with three concentrations of ESA)

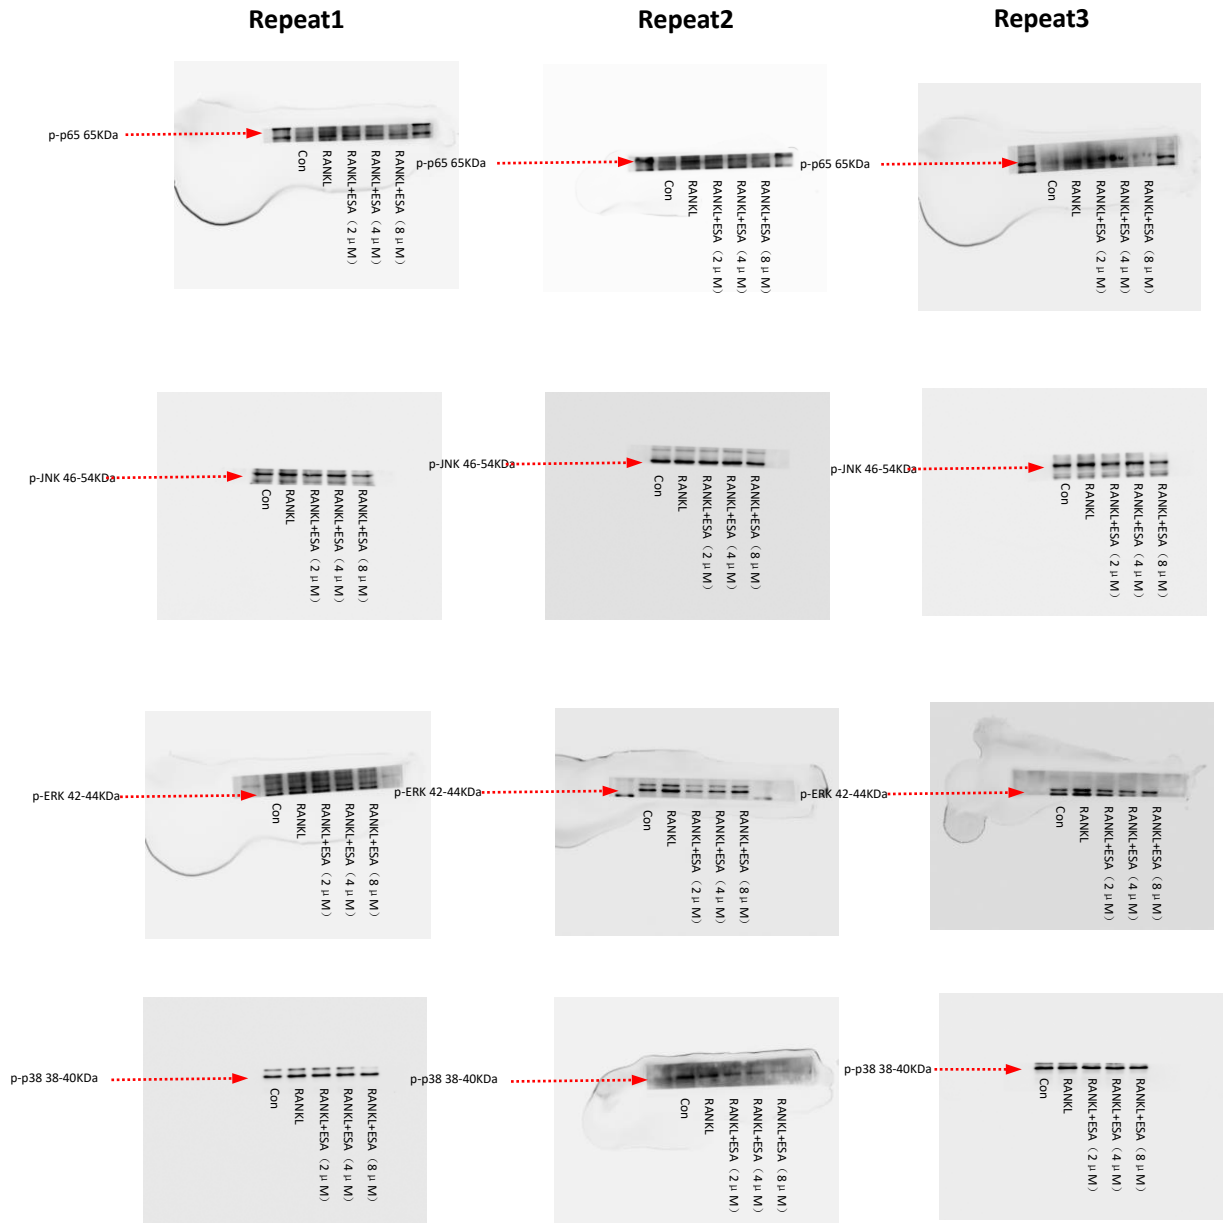

**Figure S10.** Original western blot images for three repeats of p65, JNK, p38, ERK and GAPDH/ $\alpha$ -tubulin in Figure 7A-B. (The five groups are CON, RANKL, RANKL with three concentrations of ESA)

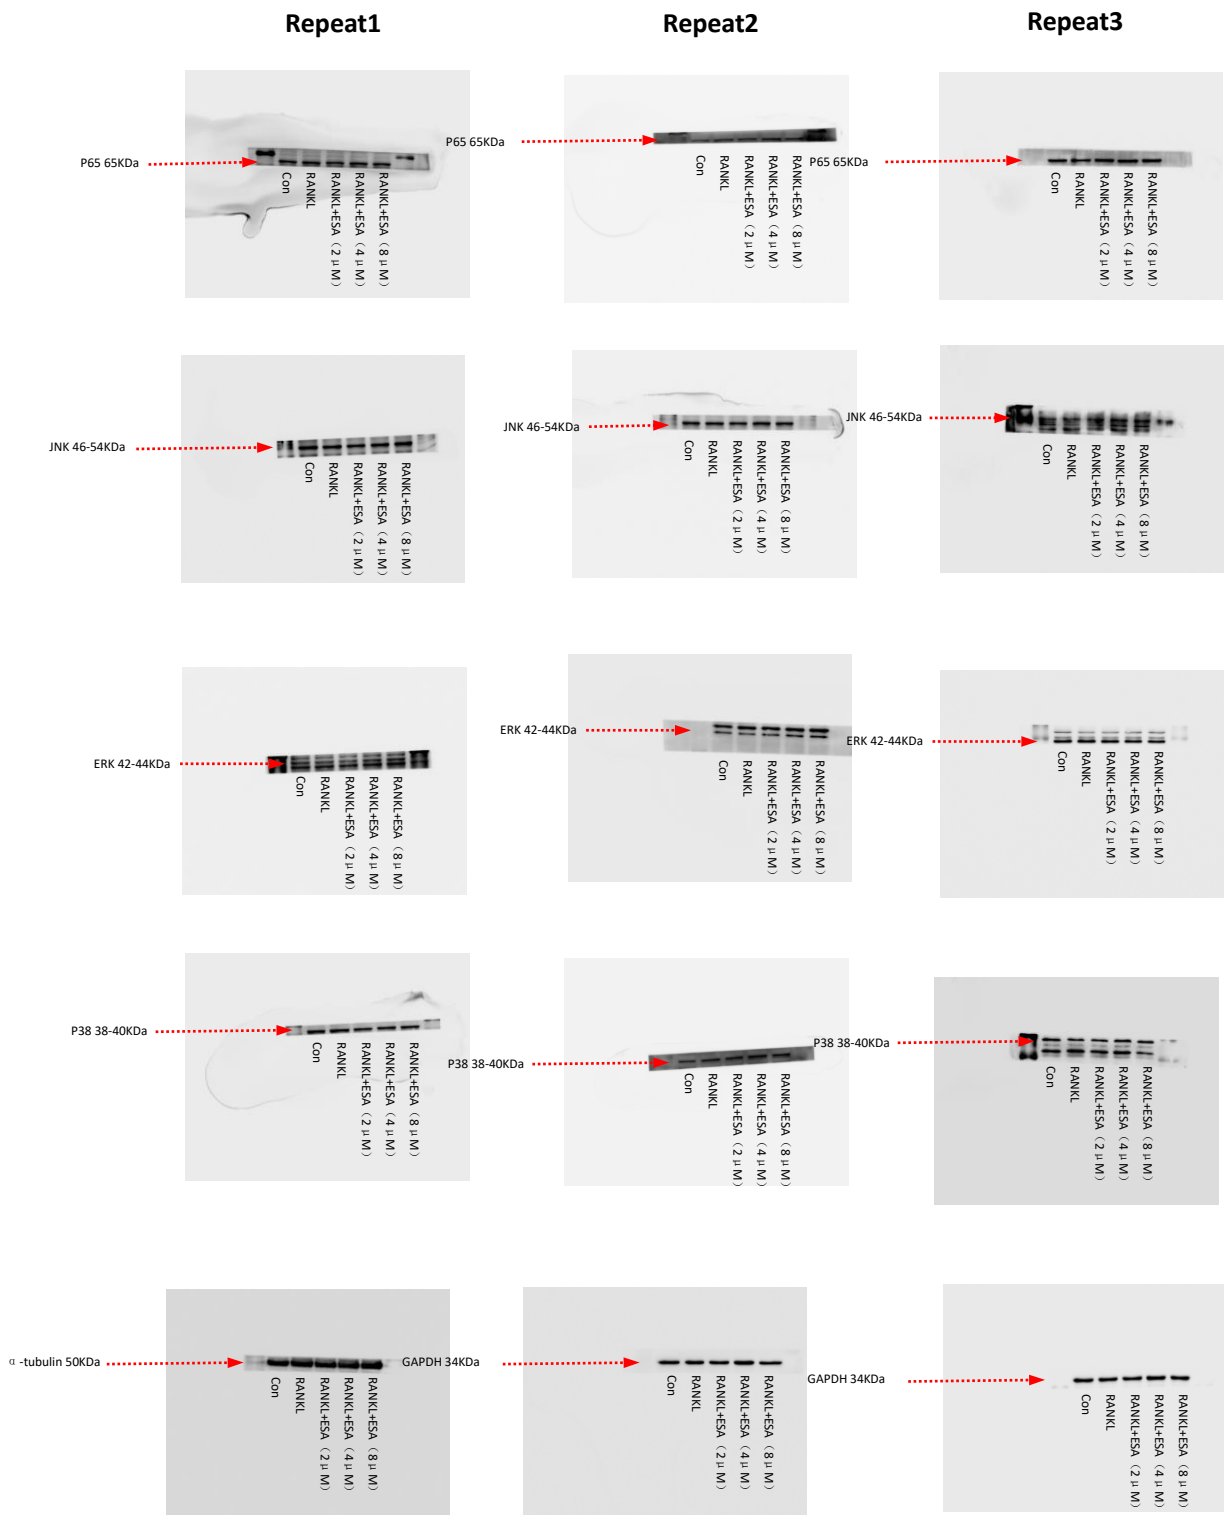

**Figure S11.** Original western blot images for three repeats of PPAR- $\gamma$  and Histone3 in Figure 7C. (The four groups are CON and three concentrations of ESA)

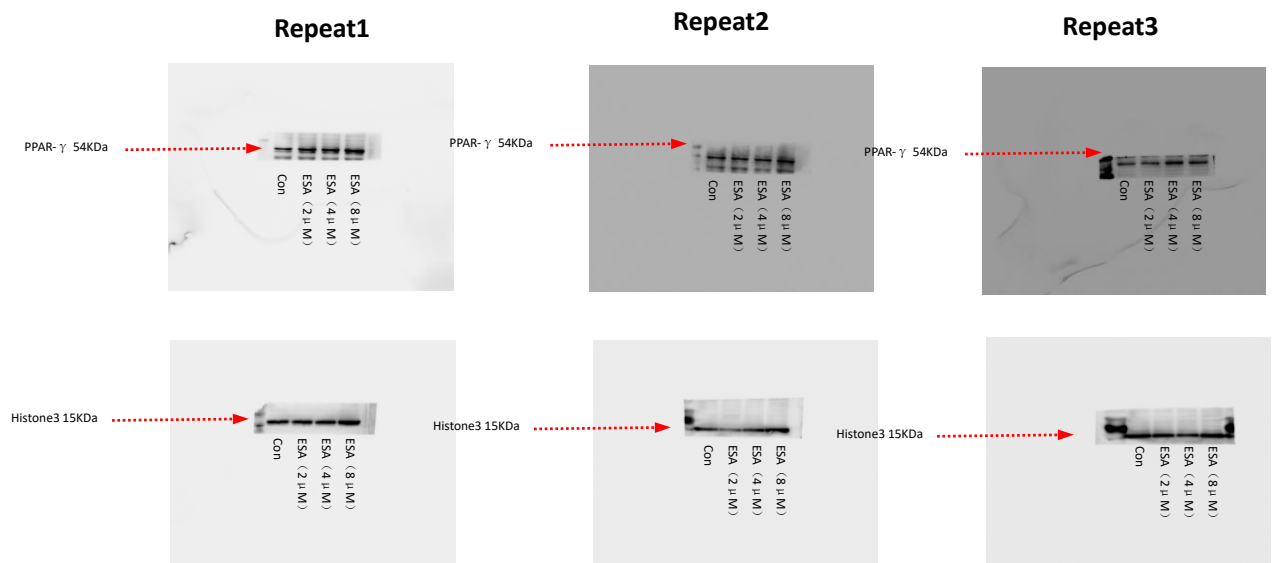

Supplement: s1 [file s1]
